# Supplementary material for: Mosquito-borne Inkoo virus in northern Sweden - isolation and whole genome sequencing
Source: Springer Nature journal article supplement (doi:10.1186/s12985-017-0725-5), 2017-03-23
Supplement: MOESM1 [file 12169364]

Table S1. Sequences of Orthobunyavirus genus specific primers used for RT-

PCR

| Primer       | Sequence                             |
|--------------|--------------------------------------|
| OrthoBun For | 5'-CTGCTAACACCAGCAGTACTTTTGAC -3'    |
| OrthoBun Rev | 5'-TGGAGGGTAAGACCATCGTCAGGAACTG -3'  |
| BCS82C       | 5'-ATGACTGAGTTGGAGTTTCATGATGTCGC -3' |
| BCS332V      | 5'-TGTCCTGTTGCCAGGAAAAT -3'          |
