# Supplementary material for: Mosquito-borne Inkoo virus in northern Sweden - isolation and whole genome sequencing
Source: Springer Nature journal article supplement (doi:10.1186/s12985-017-0725-5), 2017-03-23
Supplement: MOESM2 [file 12169364]

**Table S2.** Sequences of INKV specific primers used for RT-PCR and sequencing

|                         |                                         |
|-------------------------|-----------------------------------------|
| <b><u>S-segment</u></b> |                                         |
| INKV S1F                | 5' -AGTAGTGTGCTCCACTGAATACATTTAA-3'     |
| INKV S600R              | 5' -ACTGAGGATCCATCATAACCATGCTT-3'       |
| INKV S400F              | 5' -GATGACGATGAGTCCCAAAGAGAA-3'         |
| INKV S988R              | 5' -GTAGTGTGCTCCACTGAATACATTTAA-3'      |
|                         |                                         |
| <b><u>M-segment</u></b> |                                         |
| INKV M1F                | 5' -AGTAGTGTACTACCAAGCATAGAAAACGTTCA-3' |
| INKV M1065R             | 5' -TTCACCAATGACCATAGCACTAATAGGA-3'     |
| INKV M941F              | 5' -CCTCAGAGCAGCCAGAGTTATGT-3'          |
| INKV M2049R             | 5' -CGGGCCATACTTTCTGCAATATATGAA-3'      |
| INKV M1728F             | 5' -CGAATATGCCTTCCCTTACTAGATACTG-3'     |
| INKV M3086R             | 5' -CCTATTACATCCATTAGGTAGTTGCCC-3'      |
| INKV M2957F             | 5' -TGGAAGGTATTGAAACTGTTGAAGGGATA-3'    |
| INKV M4067R             | 5' -TTGTGTTACAGATCTTAAATTTTAGAGACA-3'   |
| INKV M3545F             | 5' -CTAGGTGTGACTCCAAAGGATGTG-3'         |
| INKV M4507R             | 5' -GTAGTGTGCTACCAAGTATATTTAAATGA-3'    |
|                         |                                         |
| <b><u>L-segment</u></b> |                                         |
| INKV L3F                | 5' -CCGAGTAGTGTACTCCTATTTACA-3'         |
| INKV L470R              | 5' -AAATCACGGCTAATAGGATCTATCC-3'        |
| INKV L67F               | 5' -ACAGAATATCAACAATTCCTTGCTCG-3'       |
| INKV L 1059R            | 5' -TATAGATTGTAGTGACTTTGATAA-3'         |
| INKV L891F              | 5' -GGAAGGCTGGGAGATGATGGT-3'            |
| INKV L 1889R            | 5' -AAAAGACCAGGAGAGGATACTATTC-3'        |
| INKV F2005              | 5' -GAACCTGCACGCTATATGATAATGAA-3'       |
| INKV L 12868R           | 5' -CATCATATCCATAATTAATTCTATAGYGG-3'    |
| INKV F3229              | 5' -AATGCAGATATGTCTAAATGGAGTGC-3'       |
| INKV L 14066R           | 5' -AAACACCATTCAATTCTATTGGTATATCT-3'    |
| INKV F4273              | 5' -GATGCTGAAATGGACCCAAGTGA-3'          |
| INKV L 14952R           | 5' -TACTATATGCTCTAAGTACTAATGCAGG-3'     |
| INKV F4920              | 5' -TTCTCCTGCATTAGTACTTAGAGCATA-3'      |
| INKV L 15937R           | 5' -CTGGTTCTTATTGCCATATGTTCTTCATT-3'    |
| INKV F5728              | 5' -AAGACACCAGAAAATATATCAATAAGTGG-3'    |
| INKV L 6922R            | 5' -GTTATATTTTTAATTTGAATATGGCCAATT-3'   |

a) Nucleotide code: Y = Pyrimidine (C or T)
